# Supplementary material for: Valorization of lignin waste: high electrochemical capacitance of lignin-derived carbons in aqueous and ionic liquid electrolytes
Source: Royal Society of Chemistry journal article supplement (doi:10.1039/c8ta07632d), 2018-01-01
Supplement: c8ta07632d1.pdf [file c8ta07632d1.pdf]

***Supporting Information***

**Valorization of lignin waste: High electrochemical  
capacitance of Lignin-derived carbons in aqueous and  
ionic liquid electrolytes**

Wantana Sangchoom, Darren Walsh and Robert Mokaya\*

University of Nottingham, University Park, Nottingham NG7 2RD, U. K.

*E-mail: r.mokaya@nottingham.ac.uk (R. Mokaya)*

**Table S1.** Elemental composition (%) and H/C ratio of lignin-derived activated carbons

| Sample   | Elemental composition (%) |      |       | H/C ratio | O/C ratio |
|----------|---------------------------|------|-------|-----------|-----------|
|          | C                         | H    | O     |           |           |
| LAC600:2 | 67.8                      | 1.36 | 30.84 | 0.02      | 0.34      |
| LAC700:2 | 83.3                      | 0.50 | 16.20 | 0.006     | 0.15      |
| LAC800:2 | 85.9                      | 0.35 | 13.75 | 0.004     | 0.12      |
| LAC600:4 | 75.3                      | 1.33 | 23.37 | 0.018     | 0.23      |
| LAC700:4 | 78.3                      | 0.52 | 21.18 | 0.0066    | 0.20      |
| LAC800:4 | 84.9                      | 0.41 | 14.69 | 0.0048    | 0.13      |
| LAC900:4 | 92.6                      | 0.36 | 7.04  | 0.0039    | 0.06      |

**Supporting Table S2.** Ion size, ionic mobility and conductivity of aqueous electrolytes used in electrochemical studies.

|                                    | Viscosity (cP)    | ions                          | Conductivity (cm <sup>2</sup> /Ωmol) | hydrate ionic radius (Å) |
|------------------------------------|-------------------|-------------------------------|--------------------------------------|--------------------------|
| 2 M H <sub>2</sub> SO <sub>4</sub> | 1.09 <sup>1</sup> | H <sup>+</sup>                | 349.8 <sup>2,3</sup>                 | 2.8 <sup>3</sup>         |
|                                    |                   | SO <sub>4</sub> <sup>2-</sup> | 78.9 <sup>3</sup>                    | 3.8 <sup>3,4</sup>       |
| 2 M KCl                            | 0.91 <sup>5</sup> | K <sup>+</sup>                | 73.5 <sup>3,6</sup>                  | 2.8-3.31 <sup>6-9</sup>  |
|                                    |                   | Cl <sup>-</sup>               | 76.35 <sup>2</sup>                   | 3.8 <sup>10</sup>        |

## References

1. G. W. Vinal, Craig, D.N., *J. Research*, 1933, **10**, 781-793.
2. M. Berowitz and W. Wan, *J. Chem. Phys.*, 1987, **86**, 376-382.
3. X. Zhang, X. Wang, L. Jiang, H. Wu, C. Wu and J. Su, *J. Power Sources*, 2012, **216**, 290-296.
4. E. Frackowiak, Beguin, Francois, ed., *Supercapacitors: materials, systems and applications*, John Wiley & Sons, 2013.
5. J. Kestin, H. E. Khalifa and R. J. Correia, *J. phys. Chem. Ref. Data*, 1981, **10**.
6. R. N. Reddy and R. G. Reddy, *J. Power Sources*, 2003, **124**, 330-337.
7. I. Persson, *Pure Appl. Chem.*, 2010, **82**, 1901-1917.
8. J. Mähler and I. Persson, *Inorg. Chem.*, 2011, **51**, 425-438.
9. M. Inagaki, H. Konno and O. Tanaike, *J. Power Sources*, 2010, **195**, 7880-7903.
10. L. A. Richards, A. Schaefer, B. S. Richards and B. Corry, *Small GTPases*, 2012, **8**, 1701-1709.

**Supporting Table S3.** A summary of electrolyte properties; molecular weight, electrical conductivity and viscosity of two ionic liquid electrolytes.

|                            | <b>Ionic size<br/>(Å)</b>                                            | <b>Density<sup>a</sup><br/>(g/cm<sup>3</sup>)</b> | <b>Conductivity<sup>b</sup><br/>(mS/cm)</b> | <b>Viscosity<br/>(cP)<sup>c</sup></b>      |
|----------------------------|----------------------------------------------------------------------|---------------------------------------------------|---------------------------------------------|--------------------------------------------|
| [EMIm][EtSO <sub>4</sub> ] | (+) 7.8 x 5.8 x 3.3 <sup>1</sup>                                     | 1.243 <sup>3</sup>                                | 3.82 <sup>2</sup>                           | 107.7 <sup>3</sup> (24 °C)<br>78.5 (30 °C) |
| [BMIm][BF <sub>4</sub> ]   | (+) 9.7 x 7.0 x 3.3 <sup>1</sup><br>(-) 3.1 x 3.1 x 3.1 <sup>1</sup> | 1.205 <sup>3</sup>                                | 4.38 <sup>2</sup>                           | 109.2 <sup>3</sup> (20 °C)<br>75.4 (30 °C) |

<sup>a</sup> The density at 20 °C, <sup>b</sup> the conductivity at 25 °C, <sup>c</sup>1 cP = 1 m Pa S

## References

1. S. Liu, W. Liu, Y. Liu, J.-H. Lin, X. Zhou, M. J. Janik, R. H. Colby and Q. Zhang, *Polym. Int.*, 2010, **59**, 321-328.
2. J. Vila, L. M. Varela and O. Cabeza, *Electrochimica Acta*, 2007, **52**, 7413-7417.
3. J. Jacquemin, P. Husson, A. A. H. Padua and V. Majer, *Green Chem.*, 2006, **8**, 172-180.

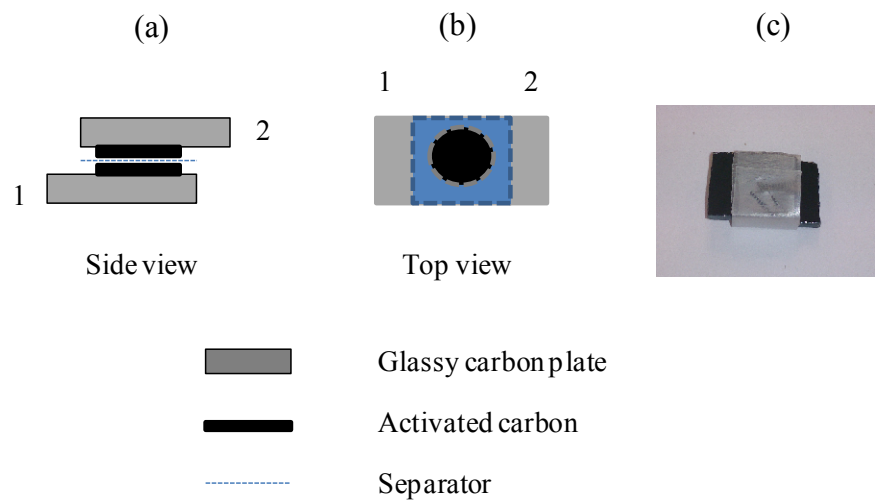

**Supporting Figure S1.** Schematic of home-made sandwich type electrode (a, b), and an actual electrode image (c).

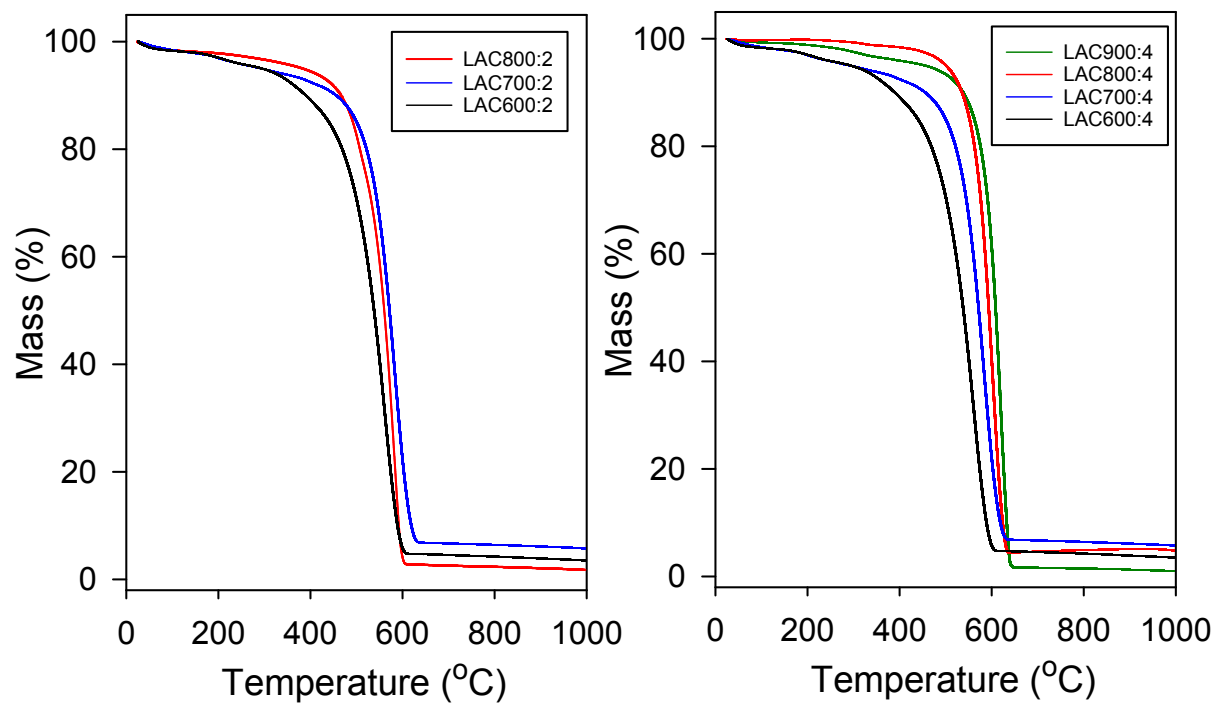

**Supporting Figure S2.** Thermogravimetric analysis curves of lignin-derived activated carbons; LACT:2 set (left panel) and LACT:4 set (right panel).

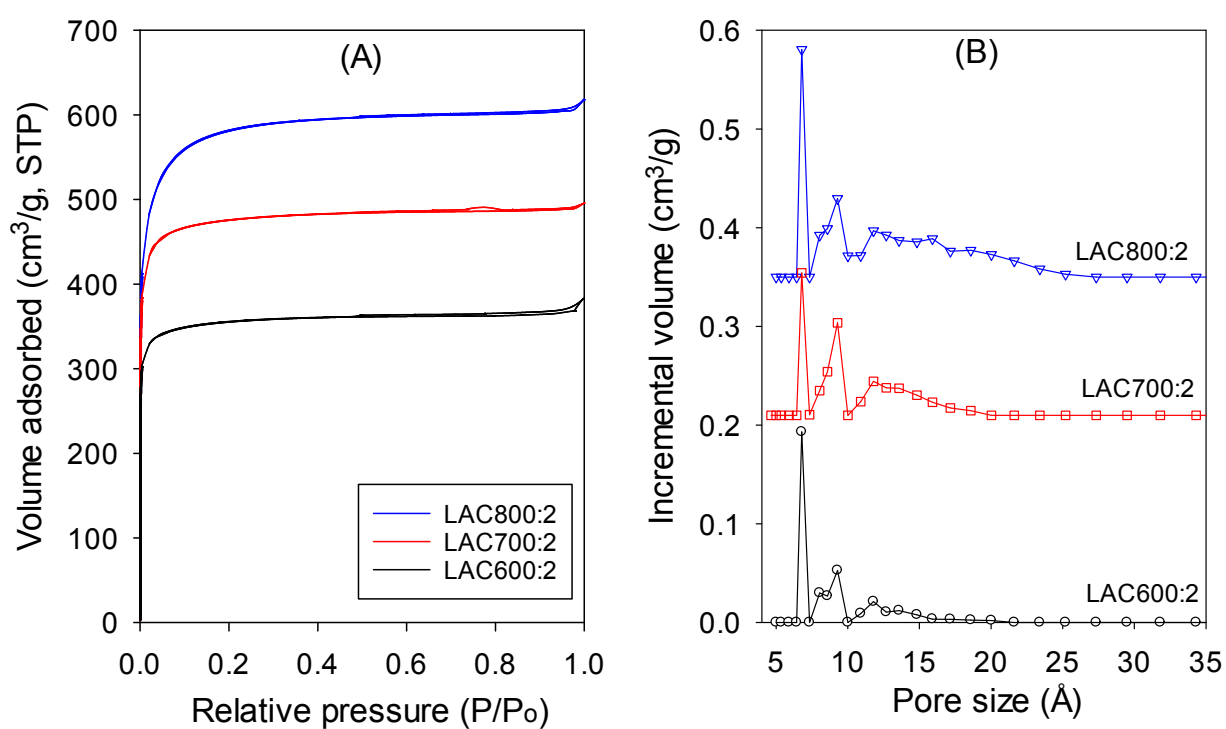

**Supporting Figure S3.** (A) Nitrogen sorption isotherms and (B) pore size distribution curves of lignin-derived carbon activated at 600 – 800 °C and KOH/hydrochar ratio of 2.

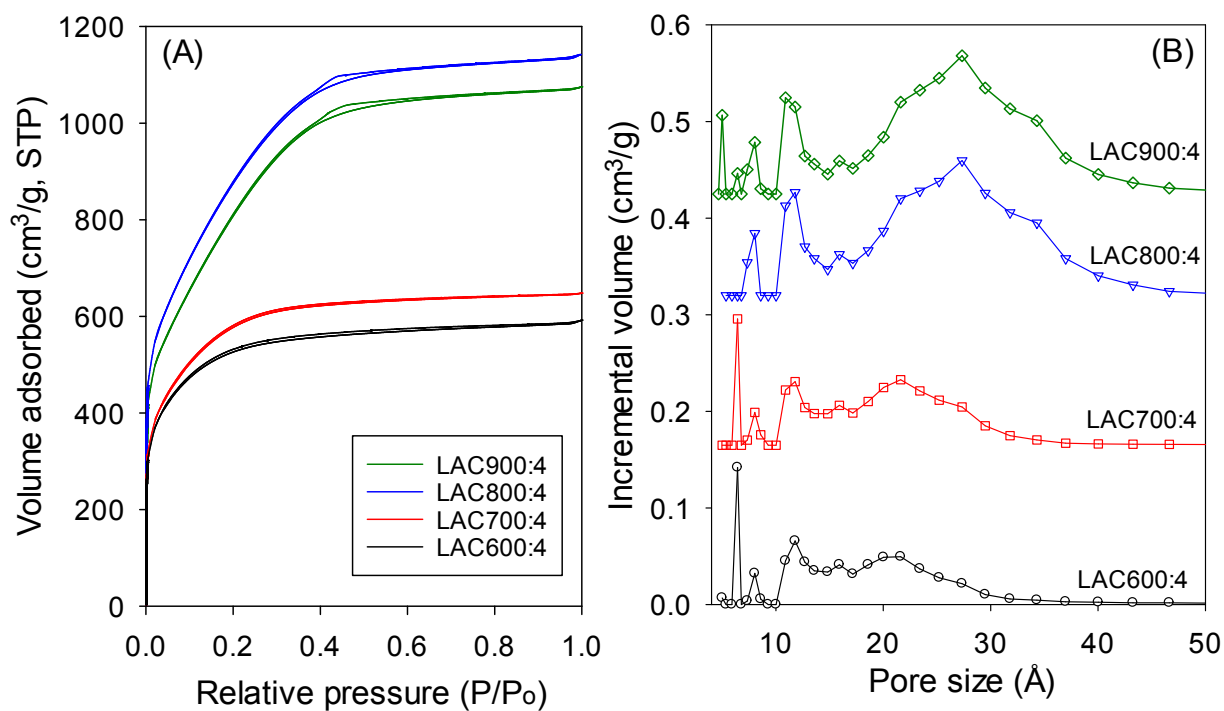

**Supporting Figure S4.** (A) Nitrogen sorption isotherms and (B) pore size distribution curves of lignin-derived carbon activated at 600 – 900 °C and KOH/hydrochar ratio of 4.



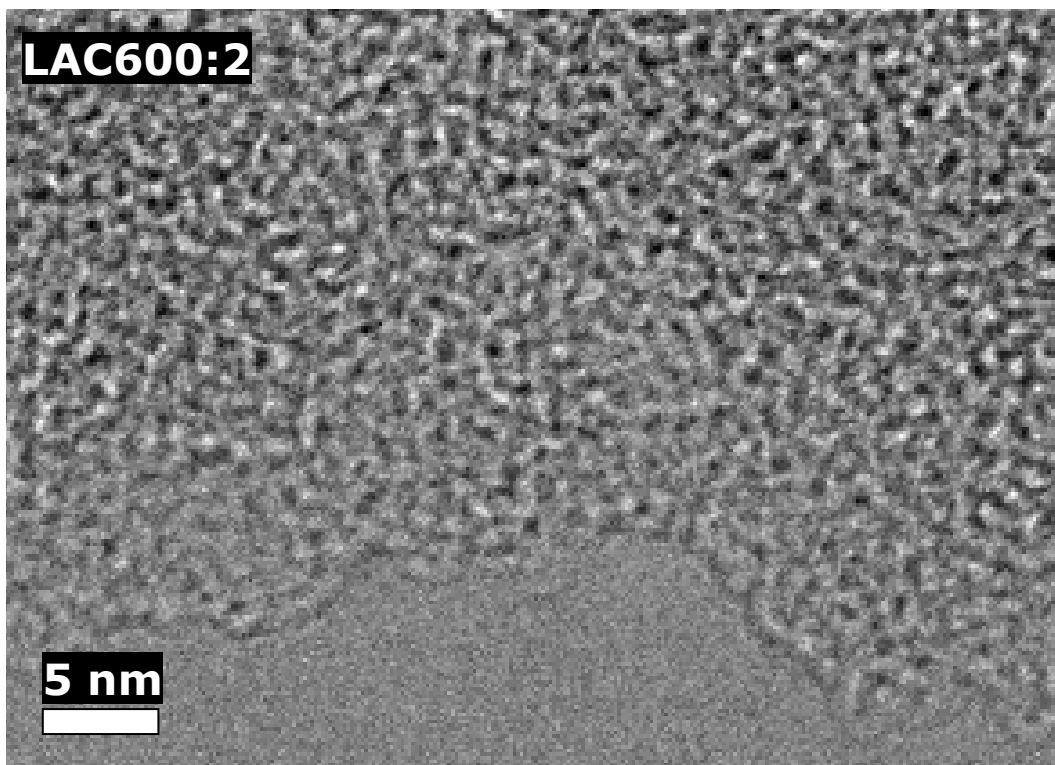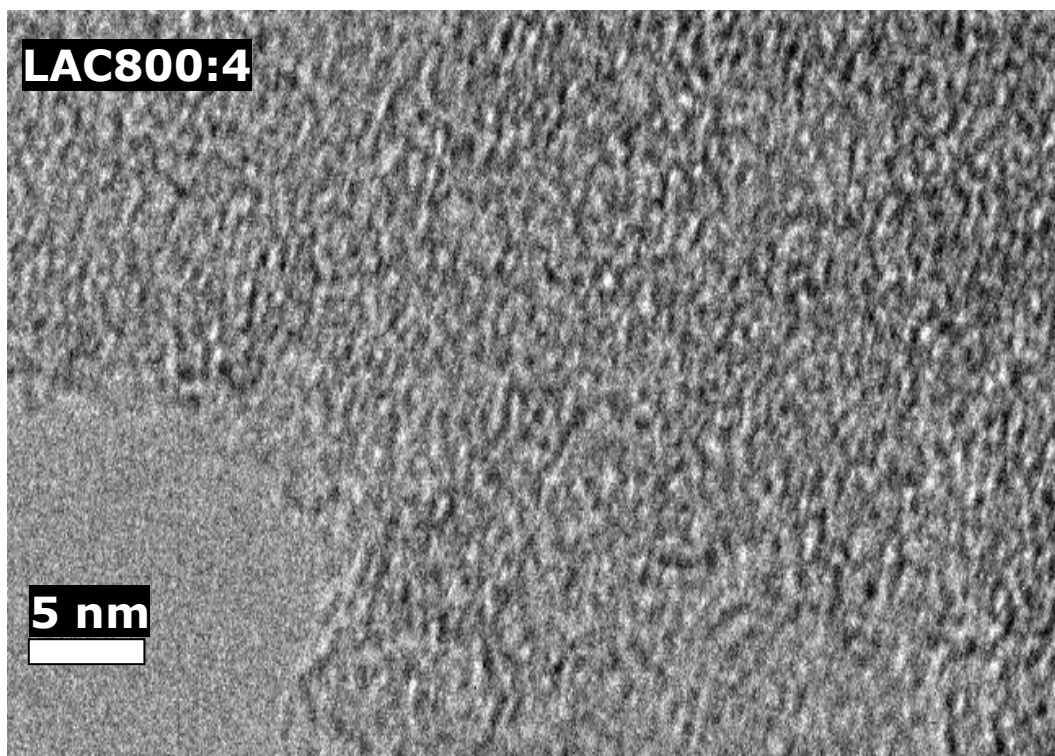

**Supporting Figure S5.** TEM images of lignin-derived activated carbons.

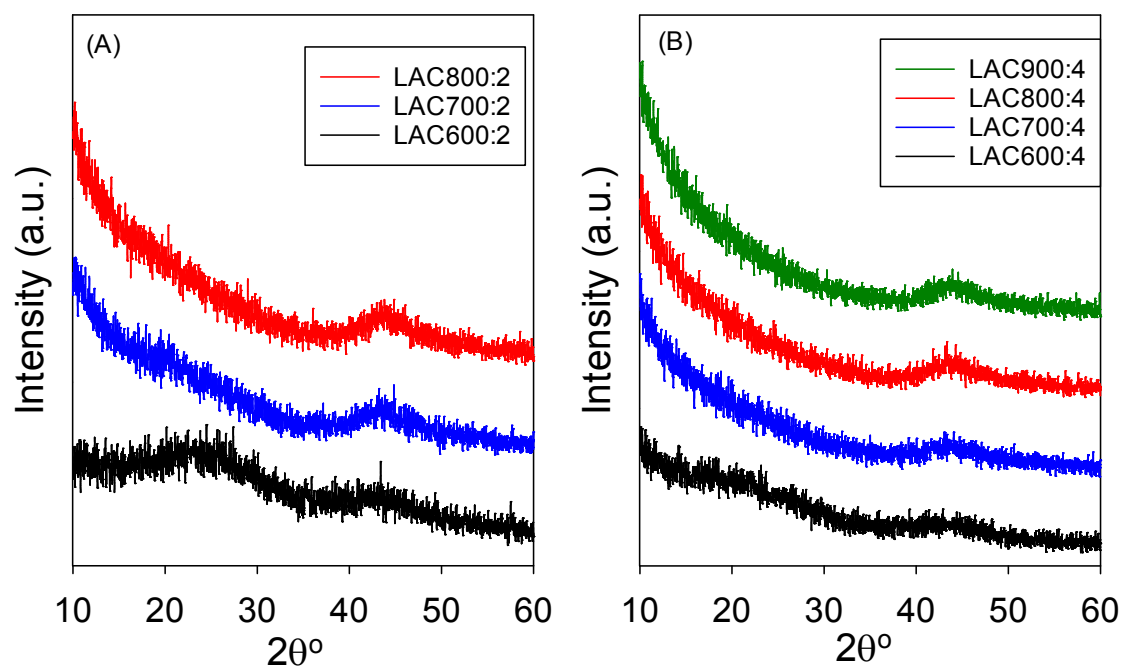

**Supporting Figure S6.** Powder XRD patterns of lignin-derived carbon activated at 600 – 900 °C and KOH/hydrochar ratio of (A) 2 or (B) 4.

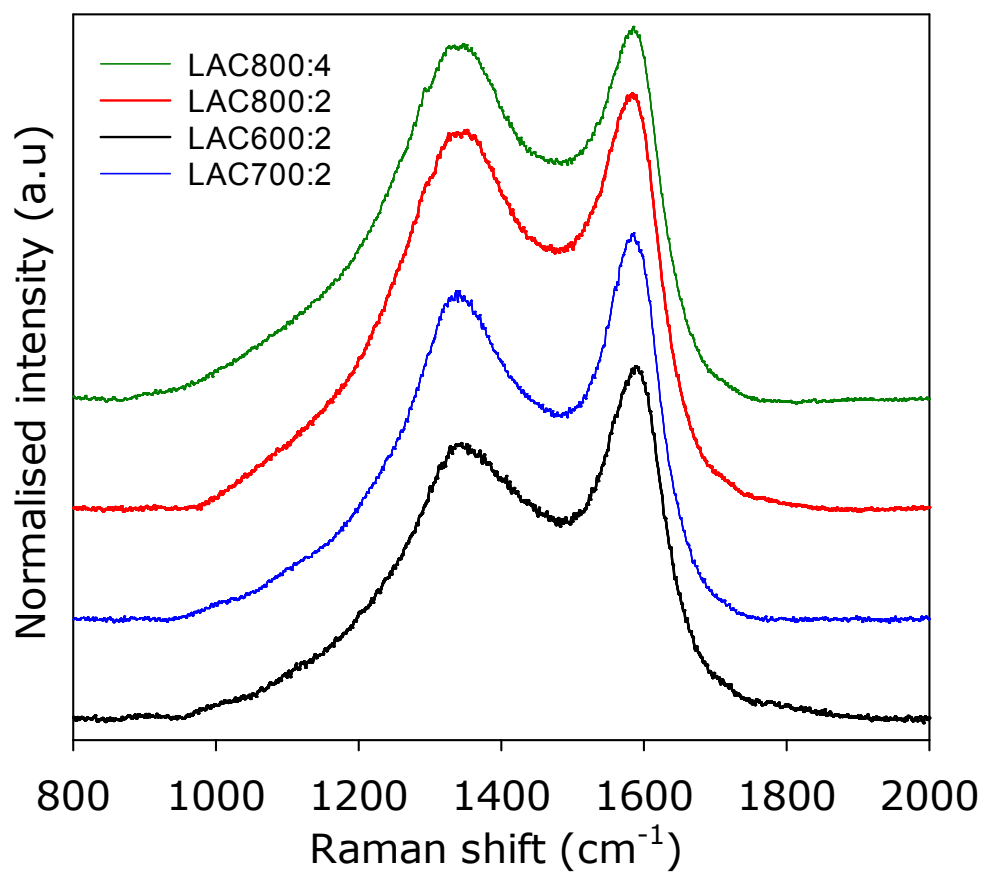

**Supporting Figure S7.** Raman spectra of lignin-derived activated carbons.

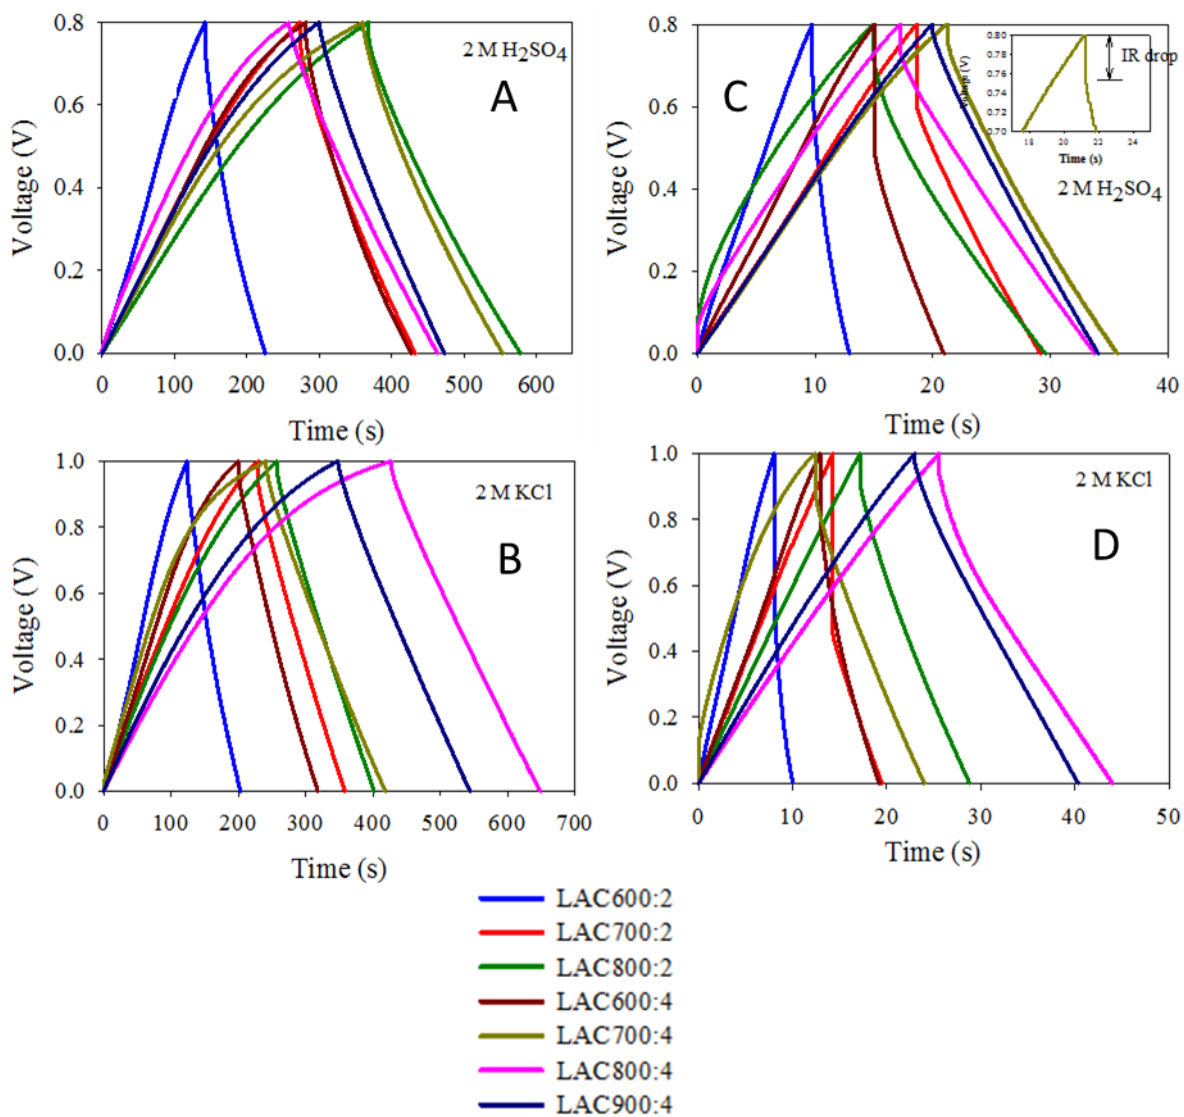

**Supporting Figure S8.** Galvanostatic charge/discharge curves of all LAC electrodes measured at different current load of 0.5 (A, B) and 5.0 A/g (C, D) in aqueous electrolytes. When the current load increases, a broad IR drop is observed at higher current load of 5 A/g (inset panel C)

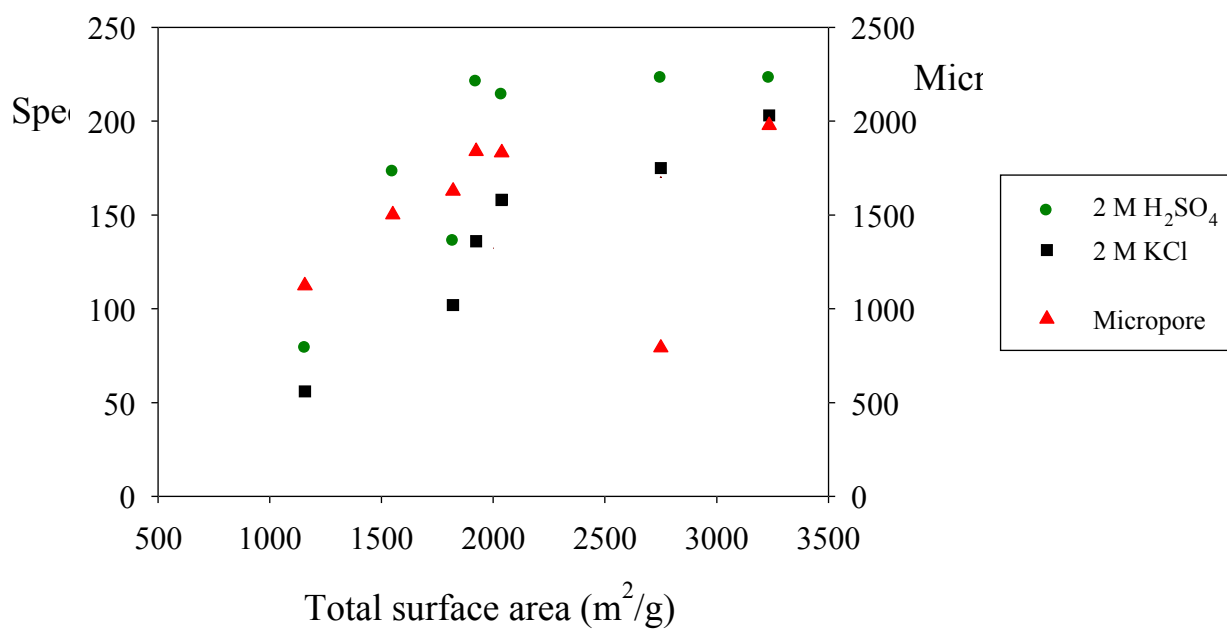

**Supporting Figure S9.** A plot of specific capacitance and micropore surface area as a function of total surface area of LAC electrodes in three aqueous electrolytes.

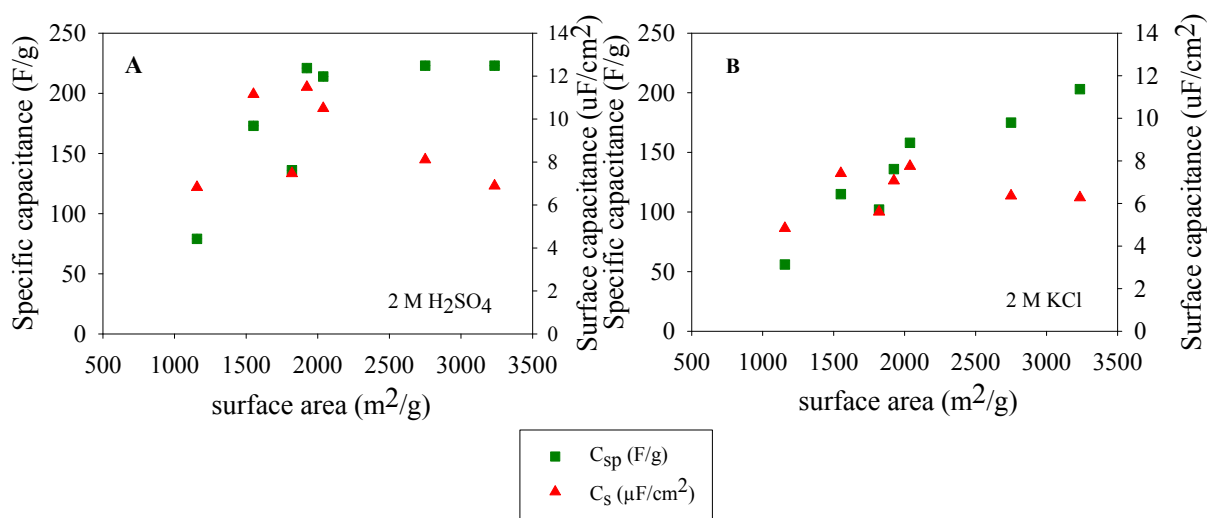

**Supporting Figure S10.** The correlation between specific capacitance ( $C_{sp}$ ) and surface area or surface capacitance ( $C_s$ ) and surface area for LAC electrodes measured in (A) 2 M  $H_2SO_4$ , and (B) 2 M KCl electrolyte.

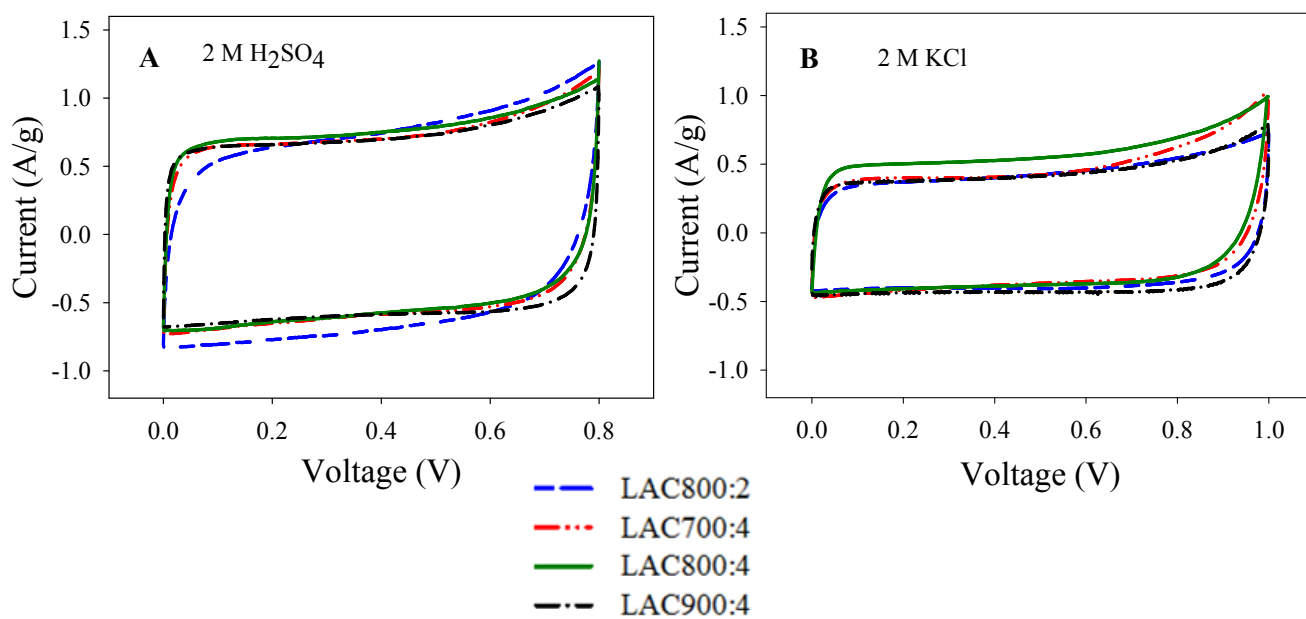

**Supporting Figure S11.** Cyclic voltammograms of highly porous LAC electrodes at scan rate of 5 mV/s in: (A) 2 M H<sub>2</sub>SO<sub>4</sub>, and (B) 2 M KCl.

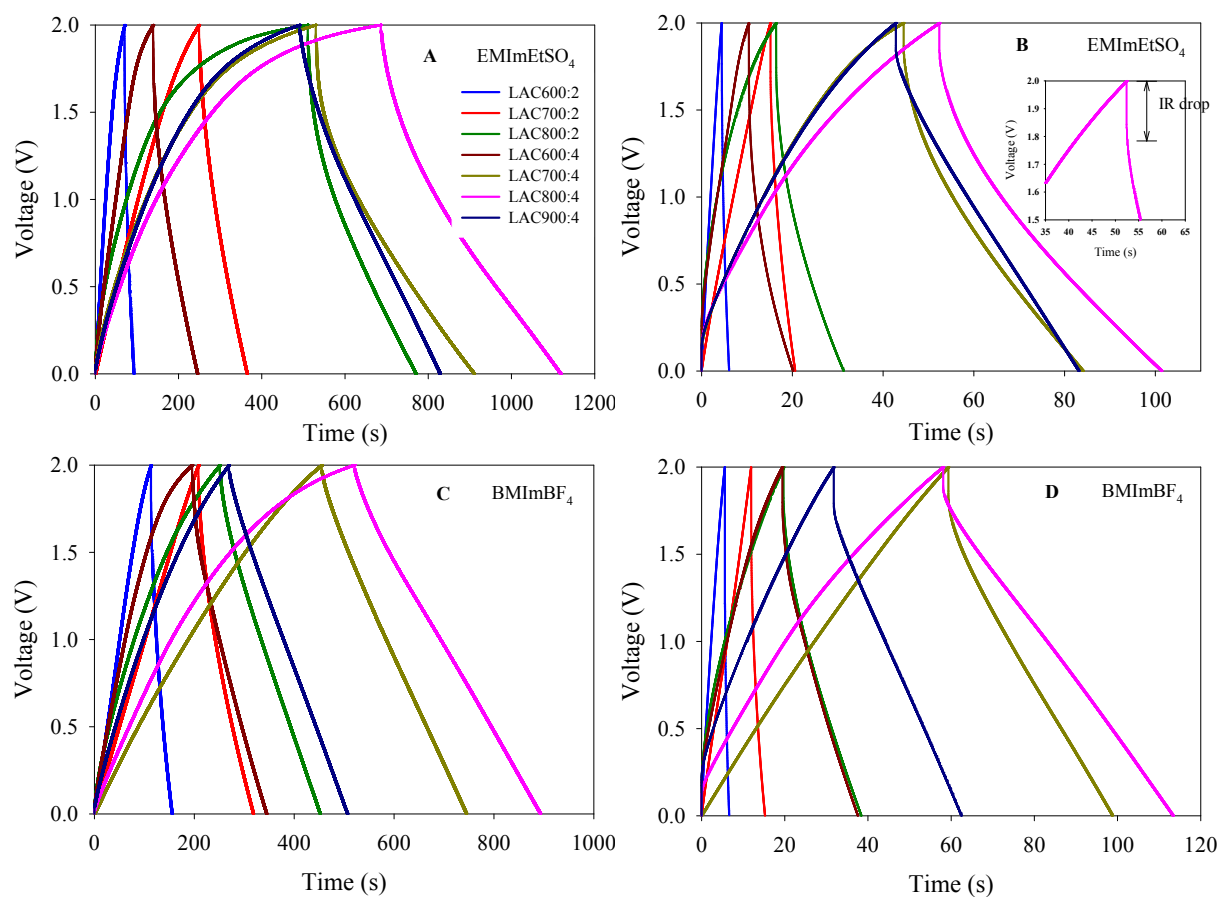

**Supporting Figure S12.** Galvanostatic charge/discharge curves measured at current load of 0.5 (A, B) and 3.0 A/g (C, D) in EMImEtSO<sub>4</sub> and BMImBF<sub>4</sub> electrolytes.



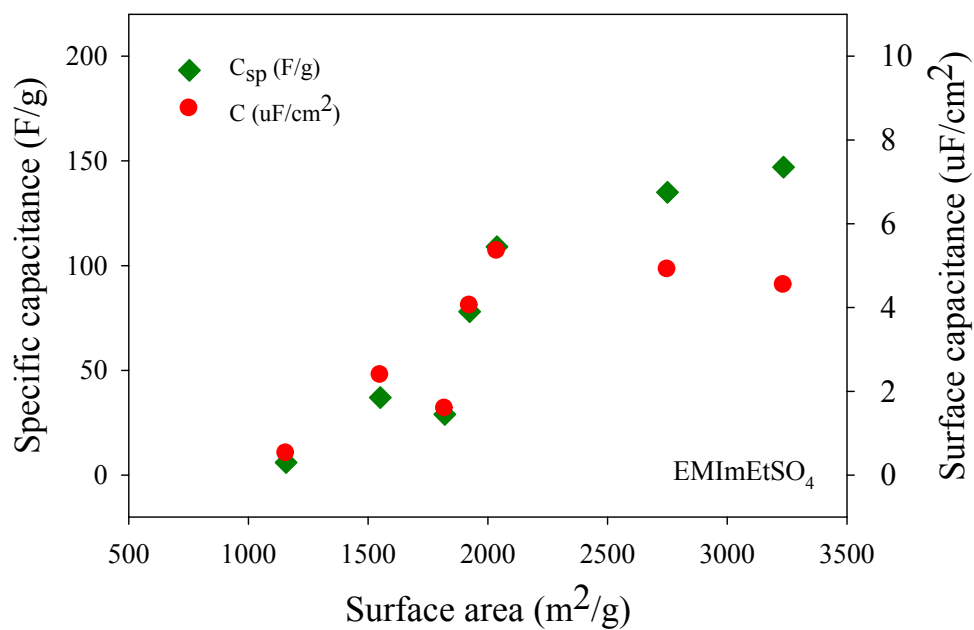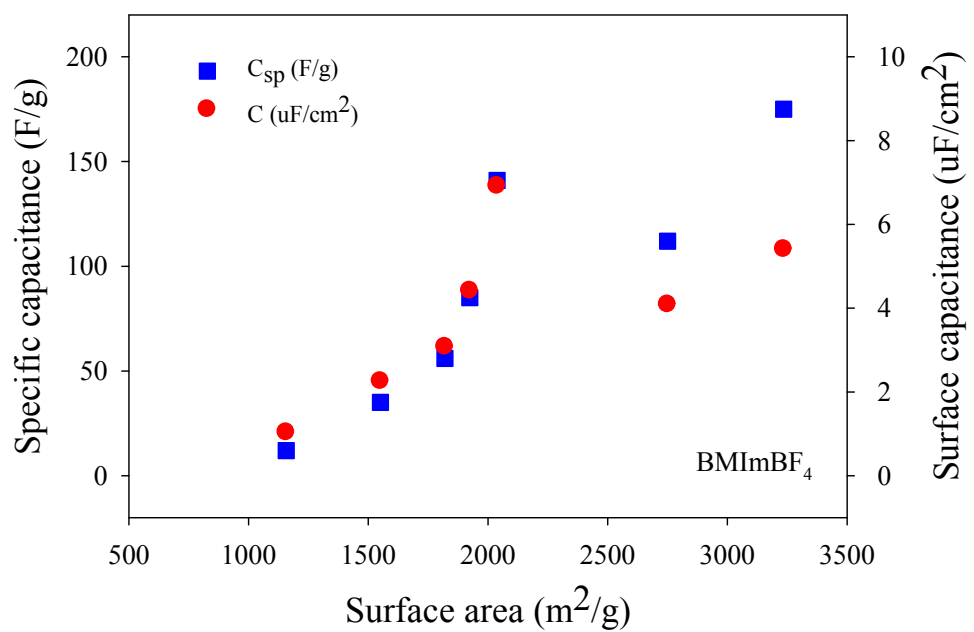

**Supporting Figure S13.** The relationship between specific capacitance or accessible surface area in term of surface capacitance with surface area of LAC electrodes measured in EMImEtSO<sub>4</sub> and BMImBF<sub>4</sub> electrolytes.

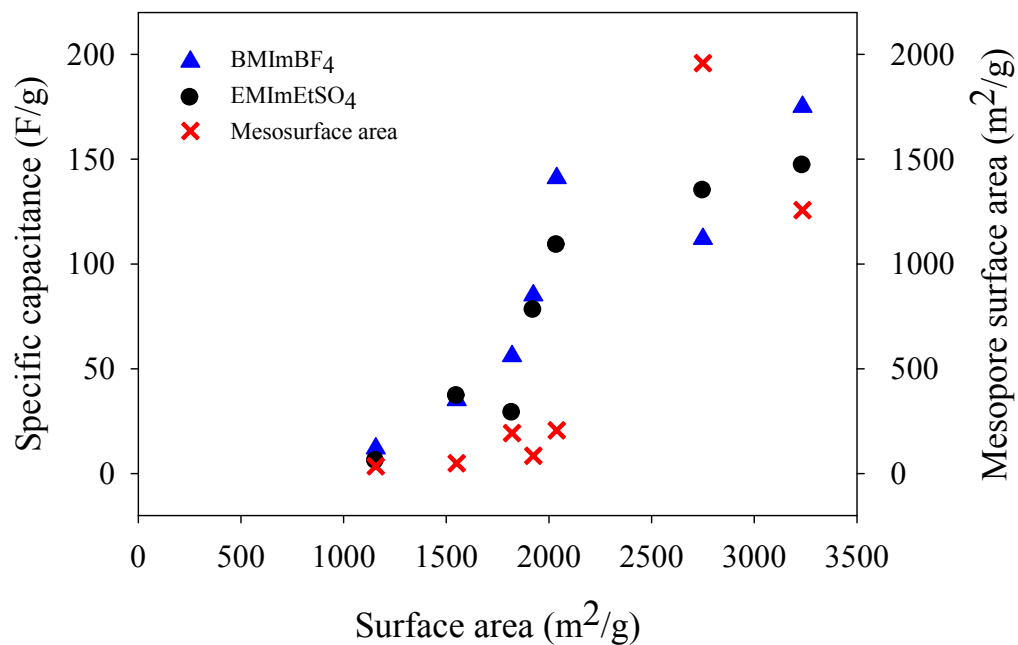

**Supporting Figure S14.** The correlation between specific capacitance and surface area or mesopores surface area of LAC electrodes measured in EMImEtSO<sub>4</sub> and BMImBF<sub>4</sub> electrolytes.

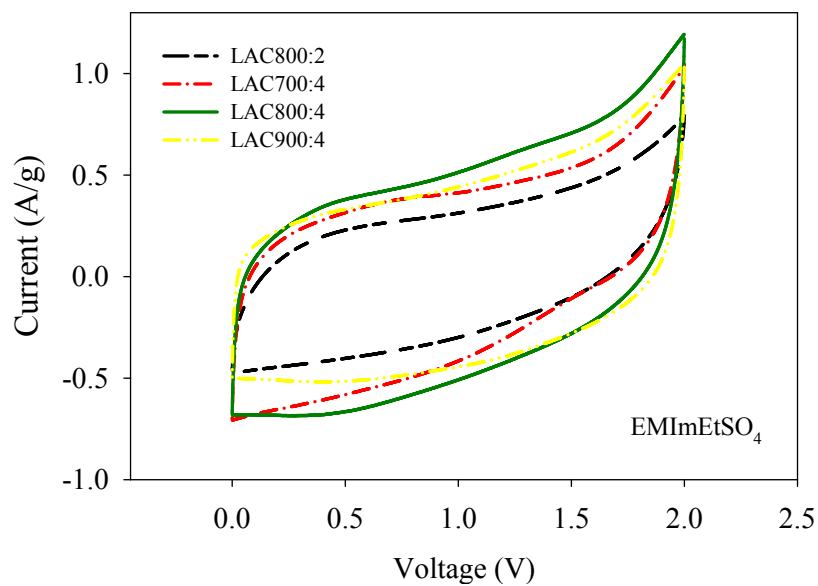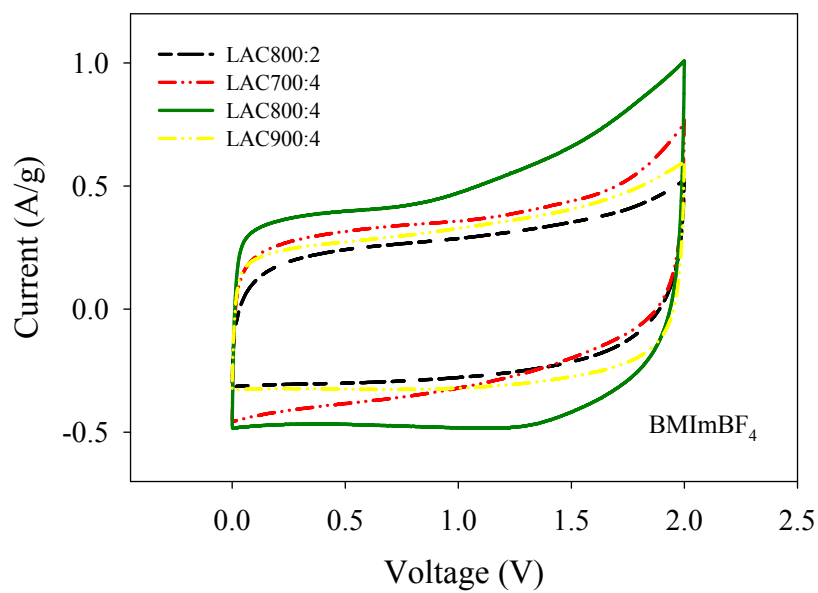

**Supporting Figure S15.** CV curves of LAC electrodes measured at scan rate of 5 mV/s in two ionic liquid electrolytes; (a) EMImEtSO<sub>4</sub>, and (b) BMImBF<sub>4</sub>.
